# Supplementary material
Source: HighWire-hosted journal article supplement (https://www.genetics.org/content/suppl/2012/01/31/genetics.111.138305)
Supplement: FigureS8.pdf [file FigureS8.pdf]

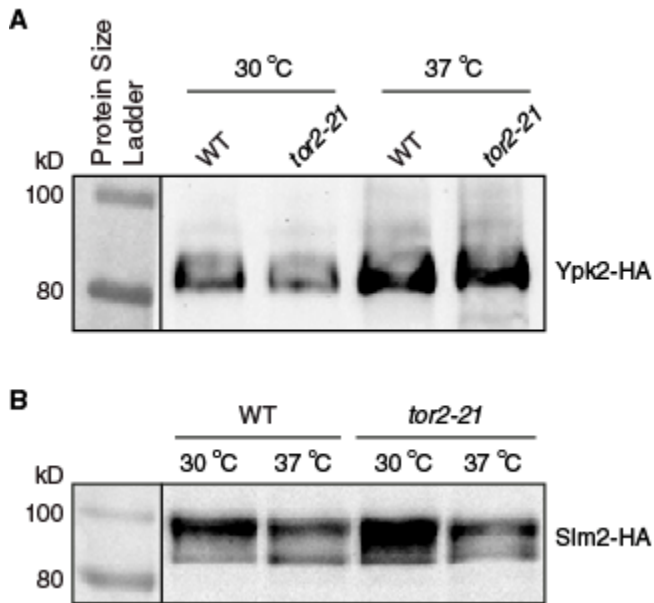

**Figure S8** Immunoblot analysis of HA-tagged Ypk2 (panel A) and Slm2 (panel B). Wild-type (WT, SH100) and temperature-sensitive *tor2-21* mutant cells (SH121) expressing C-terminal 3xHA-tagged Ypk2 or Slm2 from a centromeric plasmid (*YPK2-HA*, pTP271; *SLM2-HA*, pTP377) were grown in YNBCasD medium at 30 °C to mid-log phase and switched to 37 °C for 3h before cellular proteins were processed for Western blotting.
